# Supplementary material
Source: HighWire-hosted journal article supplement (http://www.ajnr.org/highwire/filestream/67707/field_highwire_adjunct_files/0/19-00126.pdf)
Supplement: 19-00126.pdf [file 19-00126.pdf]

**On-line Table: Interobserver grading of arterial intraluminal T1 signal intensity and enhancement on pre- and post contrast BBMRI**

| Patient                 | Affected Segment | Observer 1           |                    | Observer 2           |                    |
|-------------------------|------------------|----------------------|--------------------|----------------------|--------------------|
|                         |                  | Hyperintensity (Pre) | Enhancement (Post) | Hyperintensity (Pre) | Enhancement (Post) |
| 1                       | RA2              | 1                    | 2                  | 1                    | 2                  |
| 2                       | RM1              | 2                    | 2                  | 2                    | 2                  |
|                         | LVA              | 2                    | 1                  | 2                    | 1                  |
| 3                       | LM2              | 1                    | 2                  | 1                    | 2                  |
| 4                       | RM1              | 2                    | 2                  | 2                    | 2                  |
| 5                       | RM1              | 2                    | 2                  | 1                    | 2                  |
| 6                       | LVA              | 1                    | 2                  | 1                    | 2                  |
|                         | RM2 INF          | 1                    | 1                  | 1                    | 1                  |
| 7                       | LM2 SUP          | 2                    | 2                  | 2                    | 2                  |
| 8                       | RM2 INF          | 1                    | 2                  | 1                    | 2                  |
| 9                       | BA               | 1                    | 2                  | 1                    | 2                  |
| 10                      | LM1              | 1                    | 1                  | 1                    | 1                  |
| 11                      | LM2 INF          | 1                    | 2                  | 1                    | 2                  |
| 12                      | BA               | 2                    | 2                  | 1                    | 2                  |
|                         | RVA              | 1                    | 2                  | 1                    | 1                  |
|                         | LVA              | 1                    | 2                  | 1                    | 2                  |
| 13                      | LVA              | 1                    | 2                  | 1                    | 2                  |
| 14                      | LM1              | 1                    | 2                  | 1                    | 2                  |
| 15                      | LM1              | 1                    | 2                  | 1                    | 2                  |
| 16                      | LM2 INF          | 1                    | 2                  | 1                    | 2                  |
| 17                      | BA               | 1                    | 2                  | 1                    | 2                  |
|                         | LVA              | 2                    | 2                  | 1                    | 2                  |
| 18                      | RP2              | 1                    | 2                  | 1                    | 2                  |
| 19                      | LM1              | 1                    | 2                  | 1                    | 2                  |
|                         | LA2              | 1                    | 2                  | 1                    | 2                  |
| 20                      | RM1              | 1                    | 2                  | 1                    | 2                  |
| 21                      | LVA              | 2                    | 2                  | 2                    | 2                  |
| 22                      | LM1              | 1                    | 1                  | 1                    | 1                  |
|                         | RM2 SUP          | 1                    | 1                  | 1                    | 1                  |
| 23                      | LVA              | 2                    | 2                  | 1                    | 2                  |
| 24                      | RVA              | 2                    | 2                  | 2                    | 2                  |
| 25                      | RA2              | 2                    | 2                  | 1                    | 2                  |
| 26                      | RP2              | 2                    | 2                  | 1                    | 2                  |
|                         | LM1              | 2                    | 2                  | 1                    | 2                  |
| 27                      | LA1              | 2                    | 2                  | 2                    | 2                  |
| 28                      | LM1              | 2                    | 2                  | 2                    | 2                  |
| 29                      | LP1              | 2                    | 2                  | 2                    | 2                  |
| 30                      | LP2              | 2                    | 2                  | 2                    | 2                  |
| 31                      | LVA              | 2                    | 2                  | 2                    | 2                  |
| Interobserver agreement |                  | $\kappa = 0.63$      |                    | $\kappa = 0.89$      |                    |

**Note:**—R indicates right; L, left; A, anterior cerebral artery; M, middle cerebral artery; P, posterior cerebral artery; VA, vertebral artery; BA, basilar artery; SUP, superior division; INF, inferior division.
